# Supplementary material for: Longterm storage of post-packaged bread by controlling spoilage pathogens using Lactobacillus fermentum C14 isolated from homemade curd
Source: PLOS journal article supplement (doi:10.1371/journal.pone.0184020), 2017-08-31
Supplement: S3 (10.1371/journal.pone.0184020.s003) [file journal.pone.0184020.s003]

To  
The Chairman  
Animal Ethics Committee  
Visva-Bharati

30.12.2013

Subject: Permission to carry out animal experiment for our research

Respected Madam,

I would like to perform one animal experiment to check any kind of toxicity by *Lactobacillus fermentum* C14 in mammalian system (Swiss albino mice). Bacterial suspension will be administered to Swiss albino mice for a month through drinking water in respective feeding bottles and toxicity will be measured by assaying liver enzymes. The detail of the experiment is attached herewith.

Please do the needful for your kind approval.

Yours sincerely

*N.C. Mandal* 30.12.13

Narayan C. Mandal, Ph.D.  
Professor of Botany  
Department of Botany  
Visva-Bharati  
Santiniketan-731235

*The proposal of  
research is approved  
since non pathogenic  
bacteria only will be  
used.*

*Shreey Bhattacharya  
Chairperson 24/01/2014*

**Chairperson  
Animal Ethics Committee  
Visva-Bharati  
Santiniketan, West Bengal**
